# Supplementary material
Source: PubMed Central journal article supplement (PMC5050157)
Supplement: NIHMS815342-supplement-Table_S1___Figure_S1.pdf [file NIHMS815342-supplement-Table_S1___Figure_S1.pdf]

**Table S1. Cloning primers**

| <b>Name</b> | <b>Nucleotide Sequence<sup>1,2</sup></b>                   | <b>Resulting Plasmid</b>     |
|-------------|------------------------------------------------------------|------------------------------|
| RMI-3       | ccagtgttaatggtgactATCgaagcgaagaagagaac                     | pRS3.88AI                    |
| RMI-4       | gttctctttctcgcttcGATagtcaccattaacactgg                     |                              |
| RMI-5       | ccagtgttaatggtgactACCgaagcgaagaagagaac                     | pRS3.88AT                    |
| RMI-6       | gttctctttctcgcttcGGTagtcaccattaacactgg                     |                              |
| RMI-9       | gcatat <i>catat</i> gagtaatcaggaaccggc                     | pET28a-<br>NarL              |
| RMI-10      | atatg <i>cctc</i> gagtcacagaaaatgcgctcctgat                | pET28a-<br>NarL.88VA         |
| RMI-7       | cgcattgtggtattcagcGcctcaaccatgaagaag                       |                              |
| RMI-8       | cttctcatggttagagGcgtgaataccacaatgcg                        | pET28a-<br>NarL.88VS         |
| RMI-24      | cgcattgtggtattcagcAGcctcaaccatgaagaag                      |                              |
| RMI-25      | cttctcatggttagagCTgctgaataccacaatgcg                       |                              |
| 5cheB28     | atcccag <i>ctag</i> catgagcaaaatcaggggttatctgctgatgattcggc | pET28a-<br>CheB              |
| 3cheB15     | atcccag <i>gatc</i> ctcattaatacgtatcgctgtccggcac           | pET28a-<br>CheB.84SA         |
| RMI-26      | gttgtgatggtttctGcGctgaccggcaaaggg                          |                              |
| RMI-27      | cccttgccggtcagCgCagaaaccatcacaac                           | pET28a-<br>CheB.84SA         |
| RMI-28      | gttgtgatggtttctGTcctgaccggcaaaggg                          |                              |
| RMI-29      | cccttgccggtcaggACagaaaccatcacaac                           |                              |
| RMI-18      | gcatatg <i>gatc</i> ctatgccgtacttgagcagcggg                | pMal-<br>NarX <sub>227</sub> |
| RMI-19      | tagctat <i>ctag</i> attattactcatgggtatctccttggacg          |                              |

<sup>1</sup>Capitalized letters indicate mutated amino acid codons

<sup>2</sup>Italicized letters indicate introduced restriction sites

**Figure S1**

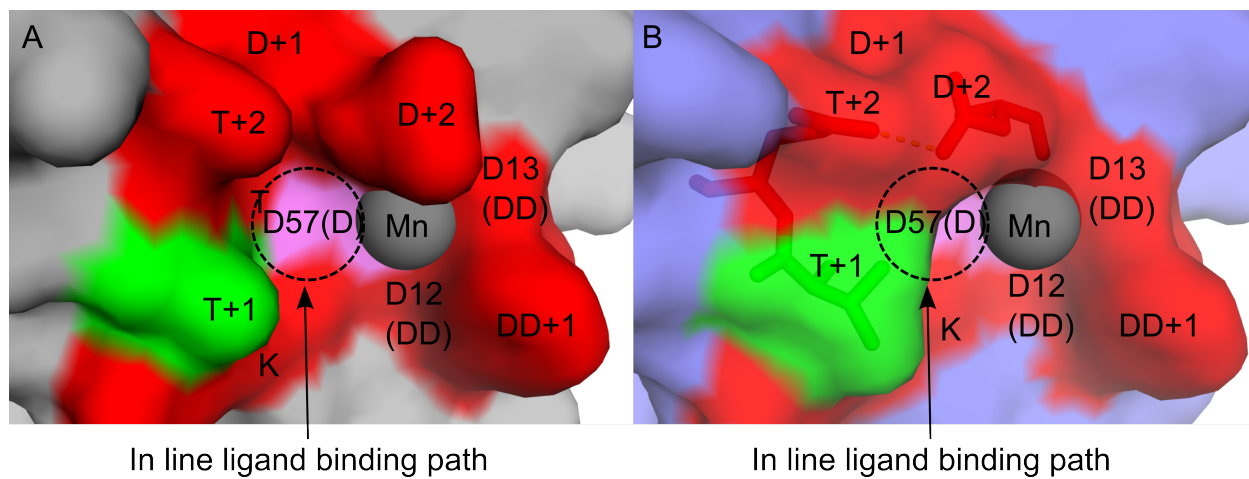

A Ser or Thr at position T+1 diminishes access of phosphodonors to the site of phosphorylation in the activated conformation of (A) wild type CheY or (B) CheYA88T.
